# Supplementary material for: Electrospun porous carbon nanofiber@MoS2core/sheath fiber membranes as highly flexible and binder-free anodes for lithium-ion batteries
Source: Royal Society of Chemistry journal article supplement (doi:10.1039/c5nr02711j), 2015-01-01
Supplement: c5nr02711j1.pdf [file c5nr02711j1.pdf]

## **Supplementary Information for**

**Electrospun porous carbon nanofiber@MoS<sub>2</sub> core/sheath fiber membranes as highly flexible and binder-free anode for lithium-ion batteries**

**Yue-E Miao, Yunpeng Huang, Longsheng Zhang, Wei Fan, Feili Lai, Tianxi**

**Liu\***

*State Key Laboratory of Molecular Engineering of Polymers, Department of Macromolecular Science, Fudan University, Shanghai 200433, PR China. E-mail addresses: [txliu@fudan.edu.cn](mailto:txliu@fudan.edu.cn); Tel: +86-21-55664197; Fax: +86-21-65640293.*

**Figure S1.** Nitrogen sorption isotherms of CNF and PCNF-20 fiber membranes.

**Figure S2.** TGA curves of PCNF-20 fiber membrane, PCNF-20@MoS<sub>2</sub> composite fiber membranes, and MoS<sub>2</sub> powder.

**Figure S3.** Initial charge/discharge curves of electrospun PCNF-10 (a), PCNF-20 (b), PCNF-30 (c) fiber membranes at a current density of 0.05 A g<sup>-1</sup>.

**Figure S4.** Rate behavior of PCNF-20@MoS<sub>2</sub>-5, PCNF-20@MoS<sub>2</sub>-10 and PCNF-20@MoS<sub>2</sub>-20 composite fiber membranes at various current densities.

**Figure S5.** Charge/discharge curves of PCNF-20@MoS<sub>2</sub>-10 composite fiber membrane for the 1<sup>st</sup>, 25<sup>th</sup> and 50<sup>th</sup> cycles.

**Figure S6.** XRD patterns of PCNF-20@MoS<sub>2</sub>-10 composite fiber membrane before and after cycling tests.

**Figure S7.** Low (a) and high (b) magnification FESEM images of PCNF-20@MoS<sub>2</sub>-10 composite fiber membrane after the cycling test.

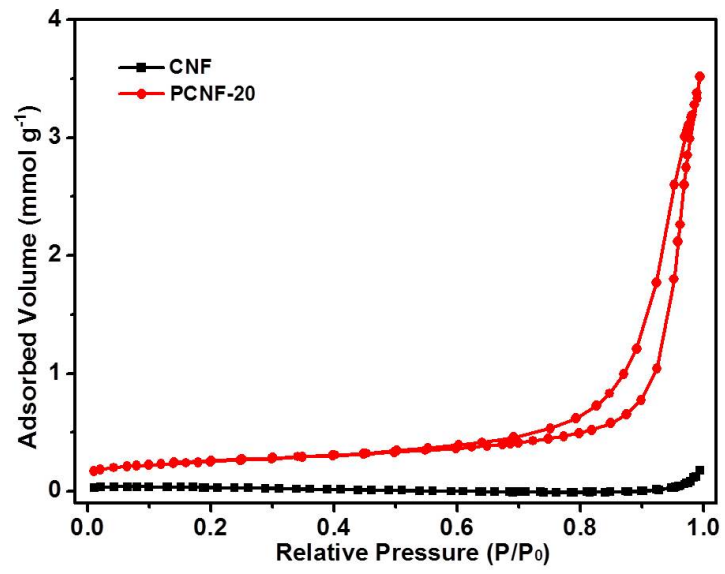

Figure S1

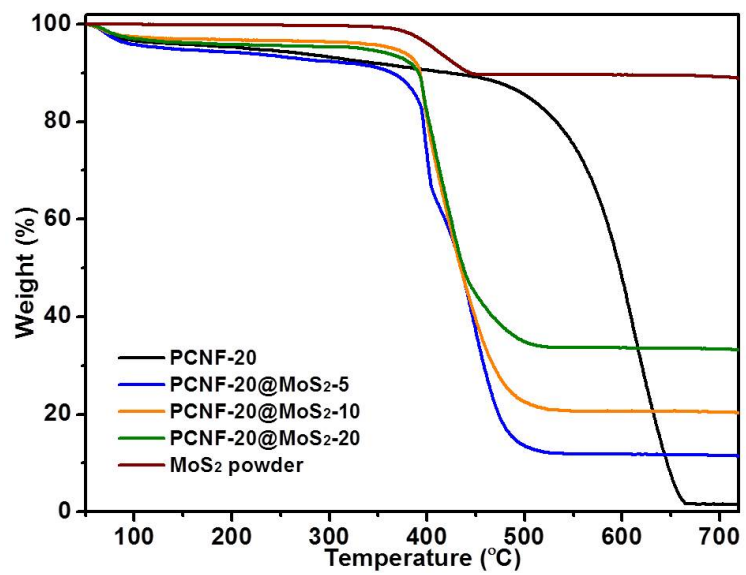

Figure S2

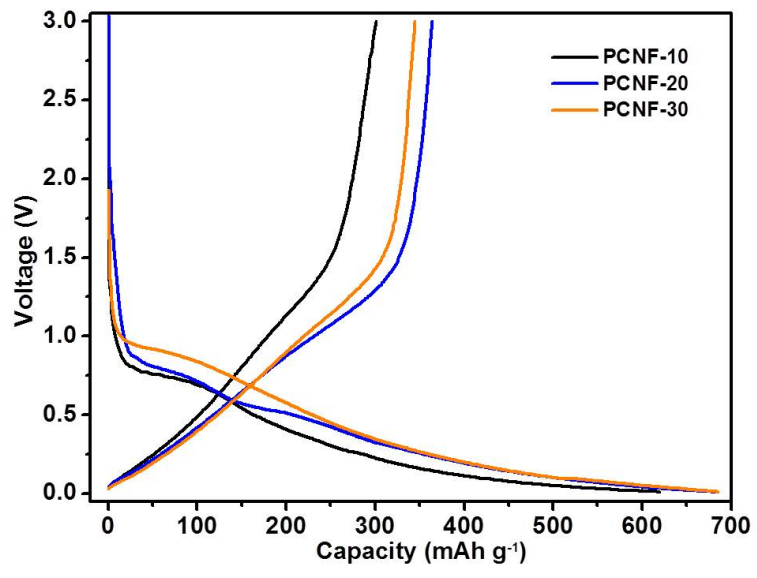

Figure S3

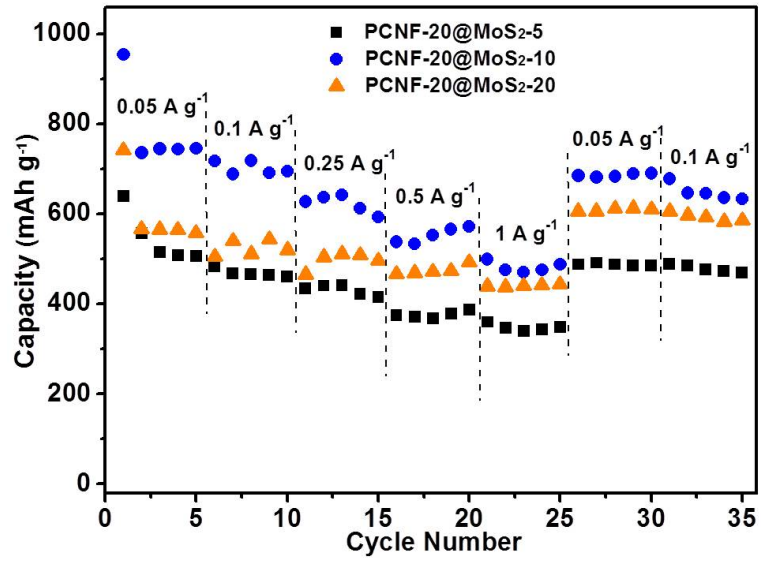

Figure S4

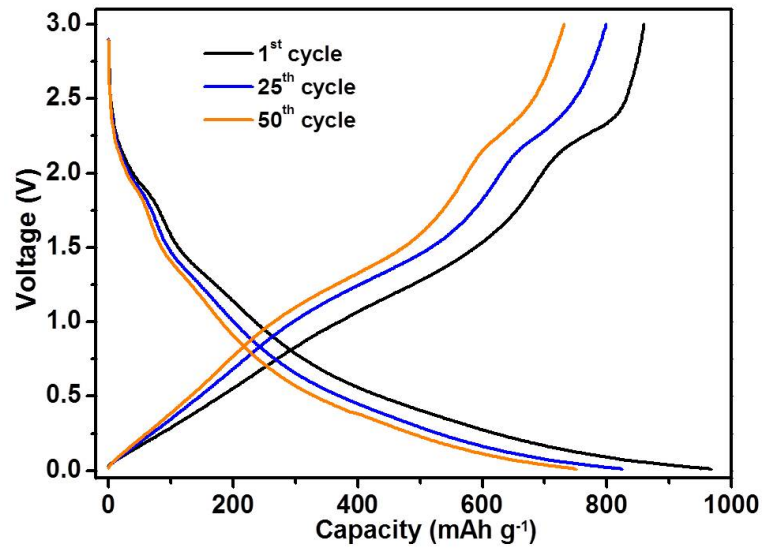

Figure S5

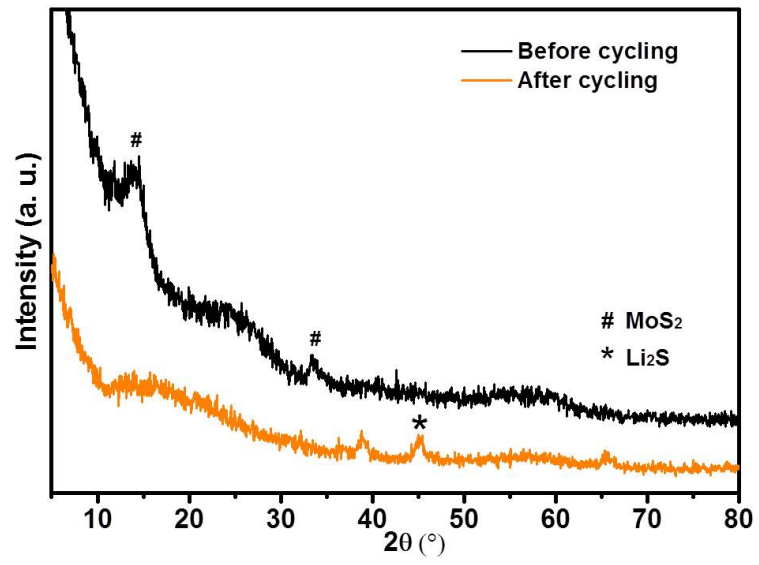

Figure S6



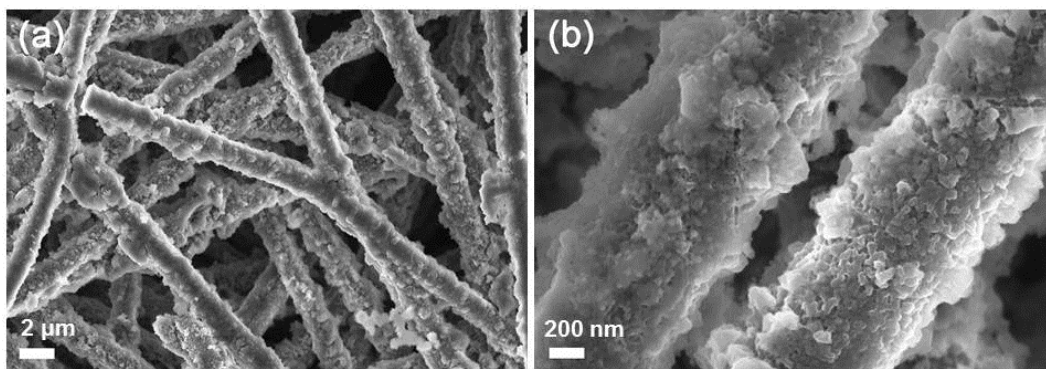

**Figure S7**
